# Supplementary material for: The Application of Cold-Induced Liquid–Liquid Extraction for the Determination of 4-Methylimidazole in Tea and Associated Risk Assessment for Chinese Tea Consumers
Source: MDPI journal article supplement (doi:10.3390/toxics11110916), 2023-11-09
Supplement: s1 [file s1]

# Supplementary Materials: The Application of Cold-Induced Liquid–Liquid Extraction for the Determination of 4-Methylimidazole in Tea and Associated Risk Assessment for Chinese Tea Consumers

Shaohua Li, Lian Wang, Dawei Chen and Hong Li

**Table S1.** Table S1: Dunn’s multiple comparisons test for the concentrations of 4-MEI among seven types of tea in China.

| Dunn's multiple comparisons test | Mean rank diff. | Significant? | Summary | Adjusted P Value |
|----------------------------------|-----------------|--------------|---------|------------------|
| OT vs. GT                        | 240.5           | Yes          | ****    | <0.0001          |
| OT vs. BT                        | 223.4           | Yes          | ****    | <0.0001          |
| OT vs. DT                        | 89.24           | No           | ns      | 0.1603           |
| OT vs. WT                        | 307.7           | Yes          | ****    | <0.0001          |
| OT vs. ST                        | 186.1           | Yes          | ****    | <0.0001          |
| OT vs. YT                        | 204.5           | Yes          | **      | 0.0025           |
| GT vs. BT                        | -17.06          | No           | ns      | >0.9999          |
| GT vs. DT                        | -151.2          | Yes          | ***     | 0.0004           |
| GT vs. WT                        | 67.22           | No           | ns      | 0.2740           |
| GT vs. ST                        | -54.36          | No           | ns      | >0.9999          |
| GT vs. YT                        | -35.99          | No           | ns      | >0.9999          |
| BT vs. DT                        | -134.2          | Yes          | **      | 0.0053           |
| BT vs. WT                        | 84.28           | No           | ns      | 0.0696           |
| BT vs. ST                        | -37.3           | No           | ns      | >0.9999          |
| BT vs. YT                        | -18.93          | No           | ns      | >0.9999          |
| DT vs. WT                        | 218.4           | Yes          | ****    | <0.0001          |
| DT vs. ST                        | 96.87           | No           | ns      | 0.2825           |
| DT vs. YT                        | 115.2           | No           | ns      | >0.9999          |
| WT vs. ST                        | -121.6          | Yes          | **      | 0.0029           |
| WT vs. YT                        | -103.2          | No           | ns      | >0.9999          |
| ST vs. YT                        | 18.37           | No           | ns      | >0.9999          |

Note: green tea (GT), oolong tea (OT), black tea (BT), white tea (WT), dark tea (DT), yellow tea (YT), and scented tea (ST).

**Table S2.** Dunn’s multiple comparisons test for the concentrations of 4-MEI among three different modes of tea processing in China.

| Dunn's multiple comparisons test | Mean rank diff. | Significant? | Summary | Adjusted P Value |
|----------------------------------|-----------------|--------------|---------|------------------|
| Non vs. Semi                     | -243.3          | Yes          | ****    | <0.0001          |
| Non vs. Full                     | -53.71          | Yes          | *       | 0.0163           |
| Semi vs. Full                    | 189.6           | Yes          | ****    | <0.0001          |

Note: Non-fermented tea (Non), Full fermented tea (Full), Semi-fermented tea (Semi).

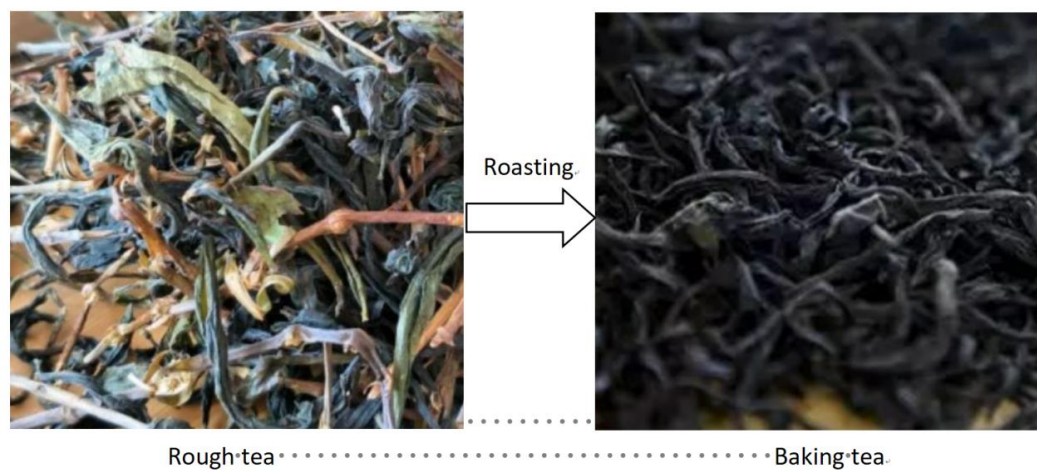

**Figure S1.** Maillard reaction in the baking process of tea.
